## RESEARCH ARTICLE

# Avian yolk androgens are metabolized rather than taken up by the embryo during the first days of incubation

Neeraj Kumar<sup>1,4,\*</sup>, Annie van Dam<sup>2</sup>, Hjalmar Permentier<sup>2</sup>, Martijn van Faassen<sup>3</sup>, Ido Kema<sup>3</sup>, Manfred Gahr<sup>4</sup> and Ton G. G. Groothuis<sup>1</sup>

## ABSTRACT

Several studies show effects of yolk androgens in avian eggs on the phenotype of the offspring. Yolk hormone concentrations decline strongly within the first few days of incubation. Although early embryonic uptake of yolk androgens is suggested by the presence of radioactivity in the embryo when eggs are injected with radiolabelled androgens, these studies do not verify the chemical identity of radioactive compound(s), although it is known that these androgens can be metabolized substantially. By using stable isotope-labelled testosterone and androstenedione in combination with mass spectrometry, enabling verification of the exact molecular identity of labelled compounds in the embryo, we found that after 5 days of incubation the androgens were not taken up by the embryo. However, their concentrations in the entire yolk albumen homogenates declined strongly, even when corrected for dilution by albumen and water. Our results indicate metabolism of maternal androgens, very likely to 5 $\beta$ -androstane-3 $\alpha$ ,17 $\beta$ -diol, etiocholanolone and their conjugated forms. The results imply that the effects of increased exposure of the embryo to maternal androgens take place either before this early conversion or are mediated by these metabolites with an as yet unknown function, opening new avenues for understanding hormone-mediated maternal effects in vertebrates.

**KEY WORDS:** Maternal effects, Early hormone conversion, Prenatal, Birds, Egg incubation, Embryonic hormone uptake

## INTRODUCTION

Exposure of the vertebrate embryo to maternal hormones can have long-lasting effects on offspring morphology, physiology and behaviour in a wide array of taxa, including fish (Brown et al., 2014; Guiguen et al., 2010; Pri-Tal et al., 2011), reptiles (Clairardin et al., 2013; Paitz and Bowden, 2011; Radder, 2007), birds (Gil, 2008; Schwabl, 1993; von Engelhardt and Groothuis, 2011) and mammals (Del Giudice, 2012; Drea, 2011; Harris and Seckl, 2011). In egg-laying vertebrate species, such as birds, almost the entirety of embryonic development occurs outside the mother's body, facilitating measurement and manipulation of this prenatal hormonal exposure. Steroid hormone deposition by the avian mother into her eggs varies with environmental cues (Eising et al.,

2001; Gil, 2008; Hahn, 2011; Müller et al., 2002; Schwabl, 1993, 1997; von Engelhardt and Groothuis, 2011; Welty et al., 2012). Hormone manipulation of avian eggs revealed a wide array of phenotypic effects on the offspring, including traits such as hatching time, hatching success, metabolic rate, immune function, endocrine function, growth, competitiveness, reproduction, mate choice and survival rate (von Engelhardt and Groothuis, 2011). It is generally thought that these hormone-mediated maternal effects are adaptive, providing a maternal 'weather forecast' for the chick to adjust its phenotype to the environment that it will experience after hatching (Groothuis et al., 2005). However, despite the many descriptive and functional studies in this field, underlying mechanisms of how and when the embryo is able to react to the maternal hormones are still not known. This hampers progress in the research field (Carere and Balthazart, 2007; Groothuis and Schwabl, 2008), for example, in understanding the role of the offspring in family conflict (Müller et al., 2007).

In order to be functional, these maternal egg hormones must reach the offspring's tissues, but whether this is indeed the case is not yet clear. Several studies indicate a strong decrease of yolk hormone concentrations within the first few days of egg incubation (Bowden et al., 2002; Eising et al., 2003; Elf and Fivizzani, 2002; Feist and Schreck, 1996; Paitz and Bowden, 2009; Wilson and McNabb, 1997) and one study showed that this is not due to mixing of yolk with albumen (Paitz et al., 2011), raising the question as to whether this is due to embryonic uptake or metabolism, and to what extent and which metabolites really reach the embryo. One explanation for the decrease in androgens and estrogens during early incubation is that conjugation of active steroids takes place, facilitating uptake of these hormones from the lipophilic environment (the yolk), after which the embryo may deconjugate the hormone when and where it is required (Paitz and Bowden, 2008, 2013).

Additional complexity is added by the fact that a steroid of interest found in embryonic tissue might not be of maternal origin but could be synthesized *de novo* by the embryo itself. Such *de novo* synthesis may be due to the activity of maternal or embryonic enzymes in the egg using maternal steroids and/or cholesterol in the yolk as a substrate (Bruggeman et al., 2002; Nomura et al., 1999). Therefore, any steroids detected in the embryonic tissues even in early development could be derived *de novo* from precursors. In order to resolve this problem, radioactive steroids have been injected into egg yolk, followed by detection of radioactivity in the embryonic tissues (Benowitz-Fredericks and Hodge, 2013; von Engelhardt et al., 2009). However, these studies could only detect radioactivity originating from the labelled hormones in embryonic tissues and did not verify the molecular identity of the radiolabelled compound. A few other studies analysing steroid metabolism in incubated eggs suggested that maternal steroids were metabolized and conjugated (Paitz et al., 2011, 2012; Vassallo et al., 2014). This indicates that radioactive compound(s) in the embryonic tissue

<sup>1</sup>Behavioural Biology, Groningen Institute for Evolutionary Life Sciences, University of Groningen, 9747 AG Groningen, The Netherlands. <sup>2</sup>Interfaculty Mass Spectrometry Center, University of Groningen, 9713 AV Groningen, The Netherlands. <sup>3</sup>Laboratory Medicine, University Medical Center Groningen, University of Groningen, 9713 GZ Groningen, The Netherlands. <sup>4</sup>Behavioural Neurobiology, Max Planck Institute for Ornithology, 82319 Seewiesen, Germany.

\*Author for correspondence (neeraj.bioscience@gmail.com)

 N.K., 0000-0003-0769-1564

could have been a different metabolite, or even a biologically inactive form of it, rather than the originally injected steroid.

In order to study early hormone metabolism and embryonic uptake, and to differentiate maternal from other newly synthesized compounds, we injected a stable isotope labelled form of the most frequently studied steroid in this field, testosterone ( $[^2\text{H}_3]\text{T}$ ), and its precursor androstenedione ( $[^{13}\text{C}_3]\text{A4}$ ), into chicken egg yolk and incubated the eggs for either zero or 5 days. The advantage of using stable isotope labels is that the metabolic outcome can be tracked using liquid chromatography combined with tandem mass spectrometry (LC-MS/MS), a method that is very accurate for molecular identification and can distinguish between naturally occurring and the heavy isotope labelled compounds that differ only with respect to their mass. The incubation time of 5 days was chosen because the gonadal differentiation (Smith et al., 1997; Yoshida et al., 1996) and the surge of the endogenous steroid production (Woods et al., 1975) in chicken embryos starts only after 5 days of egg incubation. The injected hormone values were within two standard deviations of the mean yolk hormone concentrations ( $\text{T}=0.74\pm 0.13 \text{ pg mg}^{-1}$ ;  $\text{A4}=23.24\pm 2.20 \text{ pg mg}^{-1}$ ; means $\pm$ s.d.) obtained by mass spectrometry in unincubated eggs (day 0) laid on the same day.

We characterized the *in ovo* dynamics of the labelled T and A4 over the first 5 days both in the yolk albumen homogenate and in the embryo, separating the embryo itself and its extra-embryonic membranes, including the yolk sac membrane, where the uptake of yolk and its hormones to the circulation of the embryo is likely to take place. The chicken embryo expresses the steroidogenic genes *P-450scc*, *3 $\beta$ -HSD*, *P-450c17* and *17 $\beta$ -HSD*, but not *aromatase* (Nomura et al., 1999) before day 5, which is necessary to convert androgens into estrogens, so we investigated only the androgen pathways. The majority of maternal hormones are deposited in the yolk, but the yolk becomes mixed with albumen early during incubation. Therefore, the decline in yolk hormone concentrations reported in the literature (Bowden et al., 2002; Eising et al., 2003; Elf and Fivizzani, 2002; Feist and Schreck, 1996; Paitz and Bowden, 2009; Wilson and McNabb, 1997) might be due not to metabolism but rather to the dilution of yolk, for which no evidence was found in European starling (Paitz et al., 2011) and rock pigeon (Kumar et al., 2018a) eggs, but is as yet unknown for chicken eggs. Therefore, we performed this study in the yolk albumen homogenate, enabling us to distinguish between both hypotheses. The embryonic tissue and its extra-embryonic membranes were analysed separately.

## MATERIALS AND METHODS

### Animal ethics

This study used 5-day-old chicken embryos and thus does not require an ethical license or approval from an animal experimentation committee.

### Experimental design

Fertile chicken eggs of Lohman Brown Classic strain [*Gallus gallus domesticus* (Linnaeus 1758)] were randomly collected from a local chicken farm. Eggs were randomly assigned to three weight-matched groups and incubated for 5 days at 37°C with relative humidity of 60%, either untreated or after injecting 100  $\mu\text{l}$  of sterilized sesame oil with 0.2  $\mu\text{g ml}^{-1}$   $[^2\text{H}_3]\text{T}$  or 0.58  $\mu\text{g ml}^{-1}$   $[^{13}\text{C}_3]\text{A4}$  into the yolk, following the same procedure as in our previous study (von Engelhardt et al., 2009). These concentrations were within the physiological range (two times standard deviations) of the naturally present (unlabelled) T and A4 levels, which were

determined using 200 mg homogenates of yolk plus albumen from unincubated eggs of the same batch. Although injection into the yolk at one particular spot may not adequately represent the distribution of maternal hormones over the different yolk layers, these layer structures quickly disappear after a few days of incubation. Moreover, most studies inject hormones dissolved in oil into the yolk as we did, so we can directly compare our findings with these studies. To determine the concentrations of labelled hormones, each treated egg was separated into three fractions: yolk albumen, decapitated embryo (embryo heads were used for determination of steroid receptor expression as part of another study) and extra-embryonic membranes. Each fraction was homogenized separately and used for hormone extractions. Labelled hormones were extracted from 200 mg homogenates of yolk plus albumen of unincubated [day (d)0,  $n=3$ ] and incubated (d5,  $n=3$ ) eggs, individual decapitated embryos (E,  $n=3$ ) and 200 mg of extra-embryonic membranes (EM,  $n=3$ ) for each treatment. Because of small sample sizes ( $n=3$ ), no statistical tests were performed. To convert conjugated steroids to their free forms, single extracts were hydrolysed from 200 mg of yolk albumen homogenate of incubated eggs, 100 mg of decapitated embryo homogenates and 200 mg of extra-embryonic membranes for each treatment. To exclude the possibility that the lack of labelled androgens in the decapitated embryonic tissues could be due to decapitation itself, T and A4 concentrations were determined using eggs from the same batch and the same analytical technique over the same time period for intact embryos (head plus the rest of the body) using 100 or 300 mg homogenates.

### Extraction of steroids

Each sample was extracted twice in 1 ml methanol by vortexing, followed by centrifugation at 12,000  $g$  for 10 min at room temperature. The supernatant was transferred to tubes containing 200 mg solid  $\text{ZnCl}_2$  for lipid precipitation (Wang et al., 2010). The total volume of the combined supernatants was made to 4 ml by adding 2 ml methanol, and centrifuged at 12,000  $g$  for 10 min at 4°C. The supernatant was dried under nitrogen gas in a waterbath at 50°C, resuspended in 1 ml methanol, centrifuged at 12,000  $g$  for 10 min at room temperature, followed by addition of 1.8 ml water to the supernatant. This mixture was centrifuged at 12,000  $g$  for 10 min at 4°C. The supernatant was loaded on C18 SPE columns (3 ml, 500 mg, Grace Inc.) pre-equilibrated with 3 ml methanol, followed by 3 ml water. After collecting flow through, the column was washed with 3 ml water, and then eluted with 2 ml methanol. The average recovery for extraction was 85.1 $\pm$ 4.3% (mean $\pm$ s.d.) as measured for testosterone.

The conjugated steroid levels can be estimated as the difference between hydrolysed and non-hydrolysed extracts from the same samples as the hydrolysis converts a conjugated steroid into its free form (e.g. Mi et al., 2014). For hydrolysis of conjugates, the extract was dried under vacuum and resuspended in 2 ml acetate buffer (0.5 mol  $\text{l}^{-1}$  sodium acetate with 15  $\text{g l}^{-1}$  sodium ascorbate, pH 4.8). A volume of 100  $\mu\text{l}$  of commercial extract of *Helix pomatia* (Suc d'Helix Pomatia, Brunswig Chemie) was added, vortexed and incubated at 46°C for 2 h. The hydrolysed sample was cooled at room temperature and purified on HLB SPE columns (3 ml, Waters Inc.) pre-equilibrated with 2 ml methanol, followed by 2 ml water. After collecting flow through, the column was washed with 2 ml water, and then eluted with 2 ml methanol. The eluent was dried under vacuum, resuspended in 150  $\mu\text{l}$  methanol, followed by addition of 350  $\mu\text{l}$  water to make a final concentration of 30% methanol, and was analysed by mass spectrometry.

## LC-MS/MS

The extracts were analysed by LC-MS/MS using the following two approaches. Firstly, HPLC was performed using a Shimadzu LC system, consisting of a SIL-20AC autosampler and two LC-20AD gradient pumps. Chromatographic separation was achieved at 30°C on an Alltima C18 column (2.1×150 mm 5 µm, Grace Davison Discovery Sciences). Eluent A was 100% H<sub>2</sub>O and eluent B was 100% methanol without formic acid. The elution was performed starting at 10% B, followed by a linear gradient to 80% B in 2 min followed by a linear gradient to 95% B in 3 min. Then, the column was washed at 95% B for 7 min after which it was returned to the starting conditions. The flow rate was 0.25 ml min<sup>-1</sup> and the injection volume was 30 µl. The HPLC system was coupled to an API 3000 triple-quadrupole mass spectrometer (Applied Biosystems/MDS Sciex). For positive ionization, the mass spectrometer was equipped with an atmospheric pressure chemical ionization (APCI) source. For negative ionization, a TurboIonSpray electrospray ionization (ESI) source was coupled to the mass spectrometer and a 1% ammonia solution in 50% methanol was introduced post-column with a flow rate of 0.05 ml min<sup>-1</sup>. The source temperature was 450°C. Nitrogen was used as turbo heater gas, nebulizer gas and curtain gas. Tuning parameters were optimized for the selected reaction monitoring (SRM) ion pairs of the steroids for which standards were available. For the isotopically labelled compounds SRM ion pairs were calculated (see Table S1). For each compound, two SRM ion pairs were determined, where the most intense was selected as quantifier while the other served as qualifier. For quantification of the isotopically labelled compounds the standard addition method was applied using the non-labelled forms of the compounds. Data were collected and analysed with Analyst 1.5.2 software (Applied Biosystems/MDS Sciex).

In the second method, 25 µl of <sup>13</sup>C<sub>3</sub> labelled 17-hydroxyprogesterone (30 nmol l<sup>-1</sup> in 50% methanol, *IsoSciences*) was added to each extract as an internal standard and analysed with a XEVO TQ-S tandem mass spectrometer (Waters Corp.), equipped with an Online SPE Manager and ACQUITY UPLC system (Waters Corp.). The UPLC flow rate was set at 0.4 ml min<sup>-1</sup> using 10 mmol l<sup>-1</sup> ammonium acetate, 0.1% formic acid in water and methanol (containing 0.1% formic acid) as mobile phases A and B respectively. For each extract, 40 µl sample was injected for extraction on a XBridge C8 cartridge and chromatographic separation was performed on a Kinetex C18 column (2.1×100 mm, 2.6 µm). The mass spectrometer was operated under electrospray ionization mode with following operating conditions: cone voltage of 30 V, desolvation temperature of 600°C and source temperature of

150°C, collision energy of 15–40 eV optimized for different analytes. Quantitative calibration was performed by using a calibration curve using the internal standards for each analyte. The analysis was performed by monitoring two mass transitions for each analyte. The multiple reaction monitoring (MRM) transitions (m/z) are shown in the Table S2. The quantification limit was 0.01 pg mg<sup>-1</sup> of yolk or embryonic tissues for A4 and T; and 0.02 pg mg<sup>-1</sup> for dihydrotestosterone (DHT).

## RESULTS

Naturally occurring (unlabelled) T, 5α- or 5β-DHT, or their conjugated forms were not detectable in the intact chicken embryo (head plus rest of the body, excluding extra-embryonic membranes) after 5 days of egg incubation, and A4 was present at an extremely low concentration of 0.02 pg mg<sup>-1</sup>. The levels of injected [<sup>2</sup>H<sub>3</sub>]T (Fig. 1A) and [<sup>13</sup>C<sub>3</sub>]A4 (Fig. 1B) declined strongly in the yolk albumen homogenates during the first 5 days of incubation. Labelled T was no longer detectable after 5 days of incubation in the yolk albumen homogenate, extra-embryonic membranes or the embryo itself (Fig. 1A). Labelled A4 was present in only very low concentrations and only in the yolk albumen homogenate after 5 days (Fig. 1B). Moreover, no labelled forms of DHT (one of the two biologically active metabolites of T), conjugated T or conjugated DHT were detectable in any egg fraction.

## DISCUSSION

We found a lack of labelled T in all three egg fractions, and of labelled A4 in embryonic fractions, after 5 days of incubation. The use of internal standards and sample purification during extraction procedures using ZnCl<sub>2</sub> and solid phase extraction columns ensured that the lack of labelled compounds in embryonic fractions could not be due to matrix effect (affecting differences in ionization efficiency in the mass spectrometer among samples from different tissues). If there was an uptake of even 10% of the injected labelled hormones by the embryo, as suggested in previous studies based on the radioactivity transfer to embryonic chicken tissues (Benowitz-Fredericks and Hodge, 2013; von Engelhardt et al., 2009), we would expect about 10 pg mg<sup>-1</sup> [<sup>2</sup>H<sub>3</sub>]T and 50 pg mg<sup>-1</sup> [<sup>13</sup>C<sub>3</sub>]A4 in the embryonic fractions based on embryonic weight. However, after 5 days of incubation, no labelled T or A4 was found at all, despite quantification limits as low as 0.01 pg mg<sup>-1</sup>. This indicates that in the previous studies, the labelled signal in embryonic tissue may either be due to conversion of injected androgens to other metabolites or may not have been from steroid hormones at all if the radioactive label detached from the hormone by metabolic processes.

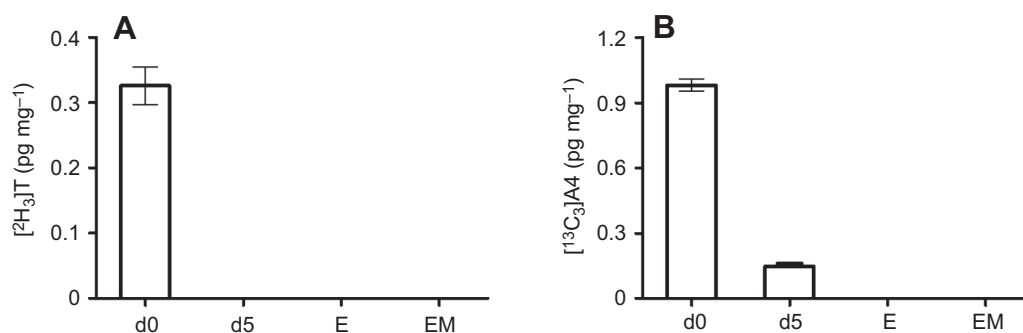

**Fig. 1. Concentration dynamics of injected stable isotope labelled [<sup>2</sup>H<sub>3</sub>]T and [<sup>13</sup>C<sub>3</sub>]A4 in fertilized chicken eggs.** (A) [<sup>2</sup>H<sub>3</sub>]T and (B) [<sup>13</sup>C<sub>3</sub>]A4 concentrations assessed in yolk-albumen homogenates at day 0 (d0), day 5 (d5), in decapitated embryos (E) and in extra-embryonic membranes (EM). Values are means±s.e.m. of sample size of three per group. Labelled forms of DHT, conjugated T and conjugated DHT were not detectable in any fraction. Raw data are available in Table S3.

Since the decline of androgen concentrations was found throughout the egg, it cannot be due to dilution with albumen or water, or embryonic uptake. This indicates that the maternal T and A4 are metabolized by embryonic and/or maternal enzymes, which is in line with the suggestions made in other studies (Gilbert et al., 2007; Kumar et al., 2018a; Paitz et al., 2011; Parsons, 1970; Vassallo et al., 2014), as explained below. This raises the intriguing question as to which metabolic products these androgens are converted into, as this will determine the biological significance of maternal hormone deposition. Since the concentrations of both labelled T and A4 declined, interconversion of these two androgens cannot explain their decrease. Furthermore, neither of these steroids was converted to DHT, the androgen with the highest affinity for androgen receptor (Fang, 2003) among the naturally occurring androgens, or the biologically inactive conjugated forms of T and DHT. Although our sample sizes were low (we were not aiming at quantitative differences between groups, but only at the verification of the uptake of injected yolk androgens by the embryo), such sample sizes have been used convincingly in other studies (Benowitz-Fredericks and Hodge, 2013; von Engelhardt et al., 2009), and our results were very consistent within each group.

Although Benowitz-Fredericks and Hodge (2013) indicated conjugation of A4, A4 cannot be directly conjugated due to lack of a hydroxyl group, suggesting that it must have been conjugation of a metabolite of A4 in their study. It is noteworthy that DHT, which is often reported to be present in the yolk at day 0 in studies using radioimmunoassays (e.g. Elf and Fivizzani, 2002; Schwabl, 1997), was not even detectable using mass spectrometry at day 0 or day 5, in spite of its very low limit of quantification ( $0.02 \text{ pg mg}^{-1}$ ), warranting some caution for the reliability of classical radioimmunoassays for hormone analyses of eggs.

Androgens are unlikely to be aromatized into estrogens (Fig. 2) at such an early stage of embryonic development as aromatase is expressed only after day 5 of incubation in chicken (Nomura et al., 1999), which is also experimentally supported by the lack of such early androgen conversion to estrogens (Parsons, 1970). Parsons (1970) suggested  $5\beta$ -androstane- $3\alpha,17\beta$ -diol as the main metabolite in an *in vitro* study on metabolism of radiolabelled T by the 2-day-old chicken embryo; Paitz et al. (2011) suggested conjugated

etiocholanolone as the main metabolite in the yolk albumen homogenates of European starling eggs incubated for 6 days; and Kumar et al. (2018a) showed etiocholanolone and its conjugate as main androgenic metabolites in rock pigeon eggs incubated for 4.5 days. These studies indicate a  $5\beta$ -reduction, followed by  $3\alpha$ -hydroxylation metabolic route for maternal T and A4 (Fig. 2).

Considering the available information from above and based on the known metabolic pathways of functionally relevant androgens (Fig. 2), the following picture emerges: early in incubation, the maternal and/or embryonic enzymes are already metabolizing yolk T and A4 into  $5\beta$ -androstane- $3\alpha,17\beta$ -diol and/or etiocholanolone, and their conjugated forms.

The functional aspects of this metabolism are intriguing and create a paradox. Despite the well-documented effects of avian yolk hormones on the embryo, chick and adult, the above-mentioned metabolites are thought to be biologically inactive. Both  $5\beta$ -androstane- $3\alpha,17\beta$ -diol and etiocholanolone are androgens with very weak binding affinity to the rat androgen receptor (Fang, 2003). A high degree of sequence similarity in the ligand-binding domain of the mammalian and chicken androgen receptor (Katoh et al., 2006) suggests that these metabolites would not activate the chicken receptors. Conjugated androgens are thought to have no biological effect as they do not bind to androgen receptors but may rather be a way to inactivate the active forms. There are two ways to resolve this paradox. First, it has been argued that  $5\beta$ -androstane- $3\alpha,17\beta$ -diol and etiocholanolone may act independently of binding to androgen receptors and contribute to erythropoiesis (Paitz et al., 2011). This may explain the wide diversity of yolk androgen effects, as such a process may influence many developmental processes. Second, the conjugated metabolites may be de-conjugated back to their free forms of these metabolites in embryonic tissues, for which some evidence was found for conjugated estrogen in the turtle egg (Paitz and Bowden, 2011). Both possibilities are open for experimental testing.

Recent studies on rock pigeon found no evidence for the contribution of maternal yolk enzymes to early steroid metabolism (Kumar et al., 2018a,b), but there could perhaps be maternal enzymes in other egg components that contribute to some extent to the early metabolism. Regardless of whether the enzymes are of

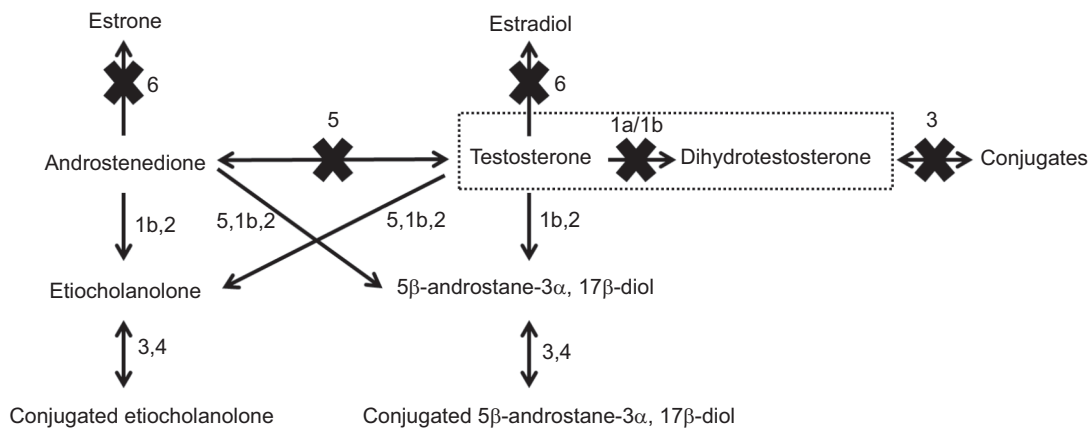

**Fig. 2. Suggested metabolic pathways for maternal T and A4 in the avian egg during early incubation.** Double arrows represent reversible pathways and single arrows represent irreversible pathways, implying that the metabolites cannot be converted back to primary androgens during later stages of embryonic development. The pathways with interconversion between A4 and T, conversion of T into DHT, and conjugation of T and DHT were undetectable in the present study; whereas conversion to estrogens is very unlikely due to a lack of expression of the aromatase gene. All these non-detectable or improbable pathways are marked with a large cross. Key to steroidogenic enzymes: 1a,  $5\alpha$ -reductase; 1b,  $5\beta$ -reductase; 2,  $3\alpha$ -hydroxysteroid dehydrogenase (HSD); 3, sulfotransferase/glucuronosyltransferase; 4, sulfatase/glucuronidase; 5,  $17\beta$ -HSD; 6, aromatase.

maternal or embryonic origin, these could be an evolutionary adaptation to use maternal hormones prior to development of the embryonic endocrine systems at the optimal time and amount needed for the embryo itself, and/or to avoid detrimental effects of the relatively high yolk hormone concentrations (Groothuis and Schwabl, 2002), as also suggested by Vassallo et al. (2014) for the stress hormone regulation in later developmental stages. If the enzymes are of maternal origin, this would open the possibility that it reflects a maternal strategy by which the mother deposits different amounts of metabolizing enzymes depending on the environmental context. If the enzymes are of embryonic origin, it may reflect the evolutionary arms race between mother and offspring, as maternal hormone deposition may not always be advantageous to the chick (Groothuis et al., 2005; Müller et al., 2007).

In conclusion, we have shown that when injected within a physiological range, the elevated yolk androgens (T and A4) are not taken up by the embryo but rather metabolized very early during incubation. It remains to be explored further whether the elevated androgen levels, before their depletion, could still exert any physiological effect on embryonic development, for instance via receptor-mediated regulation of gene expression or by directly intercalating with DNA. If not, that would suggest that embryos have evolved the capacity to metabolize maternal hormones into biologically inactive or less-potent metabolites, so that they can buffer their developing endocrine system against any detrimental consequences of such early exposure to maternal hormones, potentially playing a role in parent-offspring conflict. Alternatively, the metabolites themselves could be functional; a possibility that needs further exploration by simply injecting eggs with these metabolites and assessing their effects.

#### Acknowledgements

We thank Gerard Overkamp and Bernd Riedstra for their assistance during the experiments.

#### Competing interests

The authors declare no competing or financial interests.

#### Author contributions

Conceptualization: N.K., M.G., T.G.G.G.; Methodology: N.K., A.v.D., H.P., M.v.F., I.K., M.G., T.G.G.G.; Formal analysis: N.K., A.v.D., H.P., M.v.F., I.K.; Writing - original draft: N.K.; Writing - review & editing: N.K., A.v.D., H.P., M.v.F., I.K., M.G., T.G.G.G.; Supervision: M.G., T.G.G.G.; Funding acquisition: T.G.G.G.

#### Funding

This research was supported by Ubbo Emmius research grant by the University of Groningen (Rijksuniversiteit Groningen) to T.G.G.G. in collaboration with the Max Planck Institute for Ornithology.

#### Supplementary information

Supplementary information available online at <http://jeb.biologists.org/lookup/doi/10.1242/jeb.193961.supplemental>

#### References

- Benowitz-Fredericks, Z. M. and Hodge, M.** (2013). Yolk androstenedione in domestic chicks (*Gallus gallus domesticus*): uptake and sex-dependent alteration of growth and behavior. *Gen. Comp. Endocrinol.* **193**, 48-55.
- Bowden, R. M., Ewert, M. A. and Nelson, C. E.** (2002). Hormone levels in yolk decline throughout development in the red-eared slider turtle (*Trachemys scripta elegans*). *Gen. Comp. Endocrinol.* **129**, 171-177.
- Brown, C. L., Urbinati, E. C., Zhang, W., Brown, S. B. and McComb-Kobza, M.** (2014). Maternal thyroid and glucocorticoid hormone interactions in larval fish development, and their applications in aquaculture. *Rev. Fish. Sci. Aquac.* **22**, 207-220.
- Bruggeman, V., Van As, P. and Decuypere, E.** (2002). Developmental endocrinology of the reproductive axis in the chicken embryo. *Comp. Biochem. Physiol. A Mol. Integr. Physiol.* **131**, 839-846.
- Carere, C. and Balthazart, J.** (2007). Sexual versus individual differentiation: the controversial role of avian maternal hormones. *Trends Endocrinol. Metab.* **18**, 73-80.
- Clairardin, S. G., Paitz, R. T. and Bowden, R. M.** (2013). In ovo inhibition of steroid metabolism by bisphenol-A as a potential mechanism of endocrine disruption. *Proc. R. Soc. B Biol. Sci.* **280**, 20131773.
- Del Giudice, M.** (2012). Fetal programming by maternal stress: Insights from a conflict perspective. *Psychoneuroendocrinology* **37**, 1614-1629.
- Drea, C. M.** (2011). Endocrine correlates of pregnancy in the ring-tailed lemur (*Lemur catta*): Implications for the masculinization of daughters. *Horm. Behav.* **59**, 417-427.
- Eising, C. M., Eikenaar, C., Schwabl, H. and Groothuis, T. G. G.** (2001). Maternal androgens in black-headed gull (*Larus ridibundus*) eggs: consequences for chick development. *Proc. R. Soc. B Biol. Sci.* **268**, 839-846.
- Eising, C. M., Müller, W., Dijkstra, C. and Groothuis, T. G. G.** (2003). Maternal androgens in egg yolks: Relation with sex, incubation time and embryonic growth. *Gen. Comp. Endocrinol.* **132**, 241-247.
- Elf, P. K. and Fivizzani, A. J.** (2002). Changes in sex steroid levels in yolks of the leghorn chicken, *Gallus domesticus*, during embryonic development. *J. Exp. Zool.* **293**, 594-600.
- Fang, H.** (2003). Study of 202 natural, synthetic, and environmental chemicals for binding to the androgen receptor. *Chem. Res. Toxicol.* **16**, 1338-1358.
- Feist, G. and Schreck, C. B.** (1996). Brain-pituitary-gonadal axis during early development and sexual differentiation in the rainbow trout, *Oncorhynchus mykiss*. *Gen. Comp. Endocrinol.* **102**, 394-409.
- Gil, D.** (2008). Hormones in avian eggs: physiology, ecology and behavior. *Adv. Study Behav.* **38**, 337-398.
- Gilbert, L., Bulmer, E., Arnold, K. E. and Graves, J. A.** (2007). Yolk androgens and embryo sex: Maternal effects or confounding factors? *Horm. Behav.* **51**, 231-238.
- Groothuis, T. G. and Schwabl, H.** (2002). Determinants of within- and among-clutch variation in levels of maternal hormones in Black-Headed Gull eggs. *Funct. Ecol.* **16**, 281-289.
- Groothuis, T. G. G. and Schwabl, H.** (2008). Hormone-mediated maternal effects in birds: mechanisms matter but what do we know of them? *Philos. Trans. R. Soc. B Biol. Sci.* **363**, 1647-1661.
- Groothuis, T. G. G., Müller, W., von Engelhardt, N., Carere, C. and Eising, C.** (2005). Maternal hormones as a tool to adjust offspring phenotype in avian species. *Neurosci. Biobehav. Rev.* **29**, 329-352.
- Guiguen, Y., Fostier, A., Piferrer, F. and Chang, C. F.** (2010). Ovarian aromatase and estrogens: A pivotal role for gonadal sex differentiation and sex change in fish. *Gen. Comp. Endocrinol.* **165**, 352-366.
- Hahn, D. C.** (2011). Patterns of maternal yolk hormones in eastern screech owl eggs (*Megascops asio*). *Gen. Comp. Endocrinol.* **172**, 423-429.
- Harris, A. and Seckl, J.** (2011). Glucocorticoids, prenatal stress and the programming of disease. *Horm. Behav.* **59**, 279-289.
- Katoh, H., Ogino, Y. and Yamada, G.** (2006). Cloning and expression analysis of androgen receptor gene in chicken embryogenesis. *FEBS Lett.* **580**, 1607-1615.
- Kumar, N., van Faassen, M., Kema, I., Gahr, M. and Groothuis, T. G. G.** (2018a). Early embryonic modification of maternal hormones differs systematically among embryos of different laying order: A study in birds. *Gen. Comp. Endocrinol.* **269C**, 53-59.
- Kumar, N., van Faassen, M., de Vries, B., Kema, I., Gahr, M. and Groothuis, T. G. G.** (2018b). Gonadal steroid levels in rock pigeon eggs do not represent adequately maternal allocation. *Sci. Rep.* **8**, 11213.
- Mi, X., Li, S., Li, Y., Wang, K., Zhu, D. and Chen, G.** (2014). Quantitative determination of 26 steroids in eggs from various species using liquid chromatography-triple quadrupole-mass spectrometry. *J. Chromatogr. A* **1356**, 54-63.
- Müller, W., Eising, C. M., Dijkstra, C. and Groothuis, T. G. G.** (2002). Sex differences in yolk hormones depend on maternal social status in leghorn chickens (*Gallus gallus domesticus*). *Proc. R. Soc. Biol. Sci.* **269**, 2249-2255.
- Müller, W., Lessells, C. M., Korsten, P. and von Engelhardt, N.** (2007). Manipulative signals in family conflict? On the function of maternal yolk hormones in birds. *Am. Nat.* **169**, E84-E96.
- Nomura, O., Nakabayashi, O., Nishimori, K., Yasue, H. and Mizuno, S.** (1999). Expression of five steroidogenic genes including aromatase gene at early developmental stages of chicken male and female embryos. *J. Steroid Biochem. Mol. Biol.* **71**, 103-109.
- Paitz, R. T. and Bowden, R. M.** (2008). A proposed role of the sulfotransferase/sulfatase pathway in modulating yolk steroid effects. *Integr. Comp. Biol.* **48**, 419-427.
- Paitz, R. T. and Bowden, R. M.** (2009). Rapid decline in the concentrations of three yolk steroids during development: is it embryonic regulation? *Gen. Comp. Endocrinol.* **161**, 246-251.
- Paitz, R. T. and Bowden, R. M.** (2011). Biological activity of oestradiol sulphate in an oviparous amniote: implications for maternal steroid effects. *Proc. R. Soc. B Biol. Sci.* **278**, 2005-2010.
- Paitz, R. T. and Bowden, R. M.** (2013). Sulfonation of maternal steroids is a conserved metabolic pathway in vertebrates. *Integr. Comp. Biol.* **53**, 895-901.
- Paitz, R. T., Bowden, R. M. and Casto, J. M.** (2011). Embryonic modulation of maternal steroids in European starlings (*Sturnus vulgaris*). *Proc. R. Soc. B Biol. Sci.* **278**, 99-106.

- Paitz, R. T., Sawa, A. R. and Bowden, R. M.** (2012). Characterizing the metabolism and movement of yolk estradiol during embryonic development in the red-eared slider (*Trachemys scripta*). *Gen. Comp. Endocrinol.* **176**, 507-512.
- Parsons, I. C.** (1970). Metabolism of testosterone by early chick embryonic blastoderm. *Steroids* **16**, 59-65.
- Pri-Tal, B. M., Blue, S., Pau, F. K.-Y. and Podrabsky, J. E.** (2011). Hormonal components of altered developmental pathways in the annual killifish, *Austrofundulus limnaeus*. *Gen. Comp. Endocrinol.* **174**, 166-174.
- Radder, R. S.** (2007). Maternally derived egg yolk steroid hormones and sex determination: review of a paradox in reptiles. *J. Biosci.* **32**, 1213-1220.
- Schwabl, H.** (1993). Yolk is a source of maternal testosterone for developing birds. *Proc. Natl. Acad. Sci. USA* **90**, 11446-11450.
- Schwabl, H.** (1997). A hormonal mechanism for parental favouritism. *Nature* **386**, 231.
- Smith, C. A., Andrews, J. E. and Sinclair, A. H.** (1997). Gonadal sex differentiation in chicken embryos: Expression of estrogen receptor and aromatase genes. *J. Steroid Biochem. Mol. Biol.* **60**, 295-302.
- Vassallo, B. G., Paitz, R. T., Fasanello, V. J. and Haussmann, M. F.** (2014). Glucocorticoid metabolism in the in ovo environment modulates exposure to maternal corticosterone in Japanese quail embryos (*Coturnix japonica*). *Biol. Lett.* **10**, 20140502.
- von Engelhardt, N. and Groothuis, T. G. G.** (2011). Maternal hormones in avian eggs. In *Hormones and Reproduction of Vertebrates, Volume 4: Birds* (ed. David O. Norris and Kristin H. Lopez), pp. 91-127. Academic Press.
- von Engelhardt, N., Henriksen, R. and Groothuis, T. G. G.** (2009). Steroids in chicken egg yolk: Metabolism and uptake during early embryonic development. *Gen. Comp. Endocrinol.* **163**, 175-183.
- Wang, Q., Zhang, A., Pan, X. and Chen, L.** (2010). Simultaneous determination of sex hormones in egg products by ZnCl<sub>2</sub> depositing lipid, solid-phase extraction and ultra performance liquid chromatography/electrospray ionization tandem mass spectrometry. *Anal. Chim. Acta* **678**, 108-116.
- Welty, J. L., Belthoff, J. R., Egbert, J. and Schwabl, H.** (2012). Relationships between yolk androgens and nest density, laying date, and laying order in Western Burrowing Owls (*Athene cunicularia hypugaea*). *Can. J. Zool.* **90**, 182-192.
- Wilson, C. M. and McNabb, F. M. A.** (1997). Maternal thyroid hormones in Japanese quail eggs and their influence on embryonic development. *Gen. Comp. Endocrinol.* **107**, 153-165.
- Woods, J. E., Simpson, R. M. and Moore, P. L.** (1975). Plasma testosterone levels in the chick embryo. *Gen. Comp. Endocrinol.* **27**, 543-547.
- Yoshida, K., Shimada, K. and Saito, N.** (1996). Expression of P450(17 alpha) hydroxylase and P450 aromatase genes in the chicken gonad before and after sexual differentiation. *Gen. Comp. Endocrinol.* **102**, 233-240.
